# Supplementary material for: Quorum Sensing Signaling Molecules Positively Regulate c-di-GMP Effector PelD Encoding Gene and PEL Exopolysaccharide Biosynthesis in Extremophile Bacterium Acidithiobacillus thiooxidans
Source: MDPI journal article supplement (doi:10.3390/genes12010069), 2021-01-07
Supplement: s1 [file s1]

## Supplementary material

**Table S1.** Summary results of fluorescence binding analysis obtained with twelve different lectins in *A. thiooxidans* wild type cells.

| Lectin | Specificity <sup>a</sup>                         | <i>A. thiooxidans</i> <sup>T</sup> |
|--------|--------------------------------------------------|------------------------------------|
| AAL    | L-Fucose $\alpha$ (1,6) N-Acetyl-D-Glucosamine   | +                                  |
| BPA    | N-Acetyl-D-Galactosamine                         | +                                  |
| ConA   | Internal D-Mannose and D-Glucose                 | +                                  |
| DBA    | Terminal $\alpha$ -N-Acetyl-D-Galactosamine      | -                                  |
| GS-I   | $\alpha$ -D-Galactose                            | -                                  |
| GS-II  | N-Acetyl-D-Glucosamine                           | +                                  |
| LPA    | N-acetylneuraminic acid                          | -                                  |
| MPA    | $\alpha$ -D-Galactose                            | -                                  |
| PNA    | Galactose $\beta$ (1,4)Glucose                   | -                                  |
| SBA    | Galactose                                        | -                                  |
| UEA-I  | Linked $\alpha$ (1,2) L-Fucose                   | -                                  |
| WGA    | GlcNac $\beta$ (1,4) GlcNac $\beta$ (1,4) GlcNac | -                                  |

<sup>a</sup>, according to the manufacturer's information (EY Laboratories®, San Mateo, CA, USA).

**Table S2.** Primers used in this work.

| Name           | Sequence 5'-3' <sup>1</sup> |
|----------------|-----------------------------|
| <i>pelA1_F</i> | CCGATTGCCGCAGTTATTTATT      |
| <i>pelA1_R</i> | GCTGTCTTGATGGCTTTGATG       |
| <i>pelD_F</i>  | CACAAGTTGGCATCCTGGTTCGTT    |
| <i>pelD_R</i>  | CATGCTGCCTGCGAAAGGTAACAA    |
| <i>wgcA_F</i>  | GAACTTGTC AATGCGCCATC       |
| <i>wgcA_R</i>  | GGCCAGCAATAAATCCTGAATAC     |
| <i>flaA_F</i>  | CTGGTCACGGCCATCAATAA        |
| <i>flaA_R</i>  | CAAAGTCCCGCCAGATGTAATA      |
| 16S-F3         | ATGGCCTTTATGTCCAGGGCTACA    |
| 16S-R3         | AATCCGAACTACGACGCGCTTTCT    |
| <i>map_F</i>   | GGACCGGATTTGTCACGATTA       |
| <i>map_R</i>   | GACGTGGTTGAGGGAAATACA       |

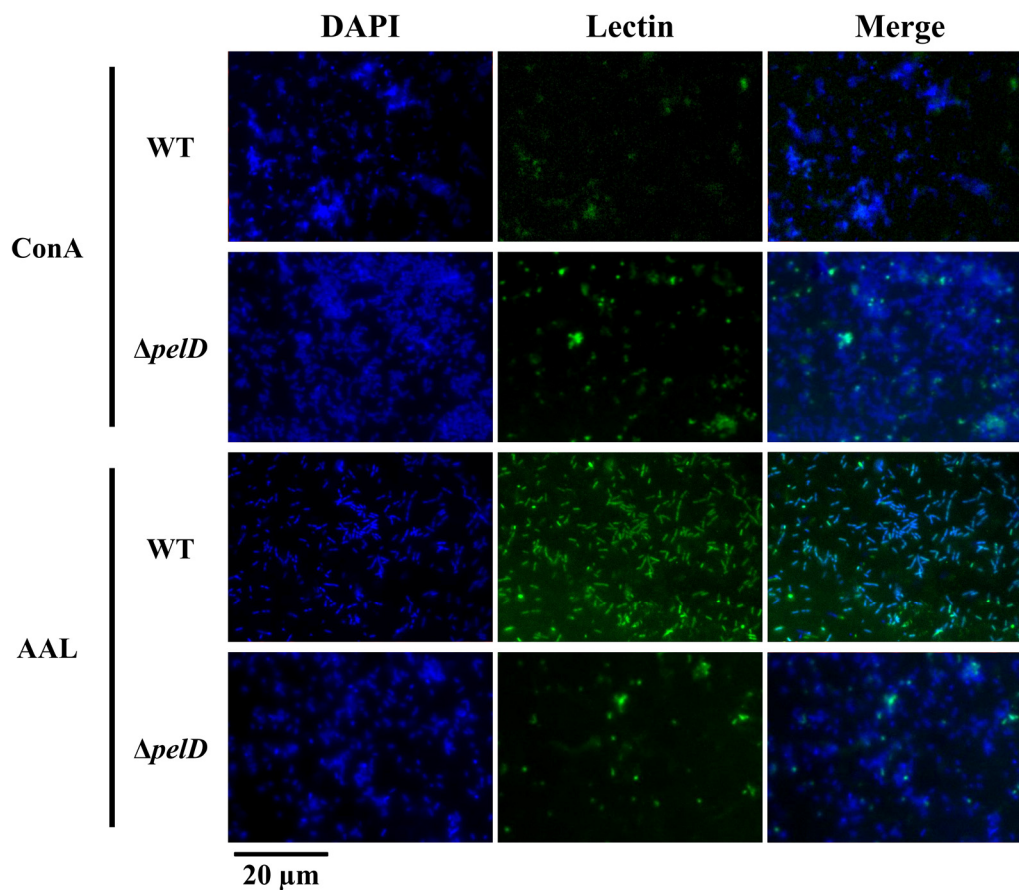

**Figure S1.** Analysis of PEL exopolysaccharide glycoconjugate composition by using epifluorescence microscopy coupled to FLBA.  $S^0$ -coupons colonized by *A. thiooxidans*<sup>T</sup> (WT) or mutant derived ( $\Delta pelD$ ) cells were extracted from 5-days growth cultures and incubated with FITC-conjugated AAL or ConA lectins. Then, they were stained with DAPI before microscopy imaging. Size bars represent 20  $\mu\text{m}$ .

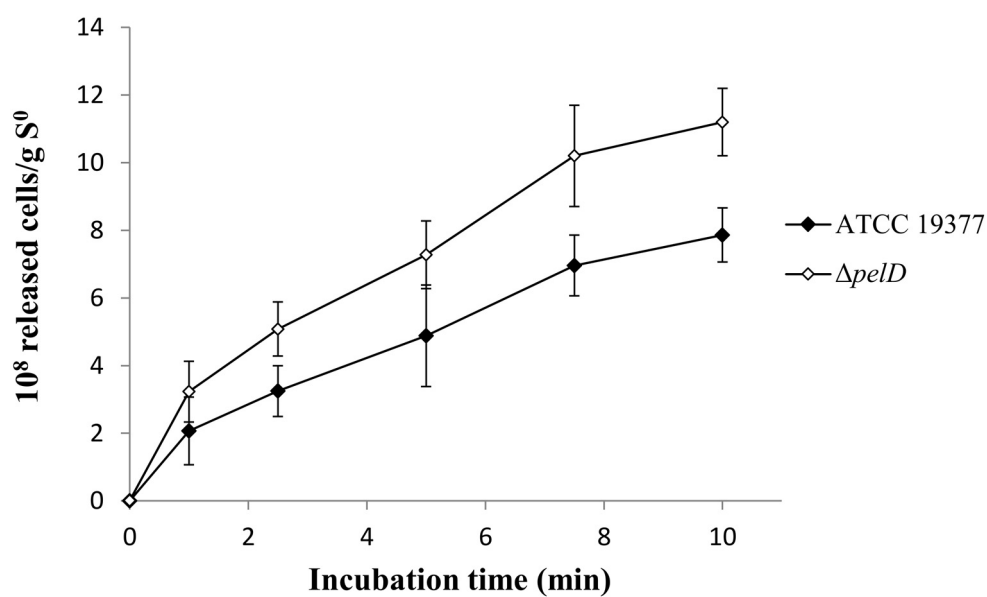

**Figure S2.** The loss of PEL exopolysaccharide contributes to the production of a fragile biofilm in *A.*

*thiooxidans*. Inoculated S<sup>0</sup>-coupons were extracted from 5-days growth cultures and treated with 0.05 % Triton X-100. Then they were vortexed during 10 min. Number of cells released from the wild type and  $\Delta pelD$  null-mutant biofilms subjected to the mechanical stress was determined with a Petroff-Hausser counting chamber and normalized against mass of sulfur. Standard deviations were calculated from three independent cultures.

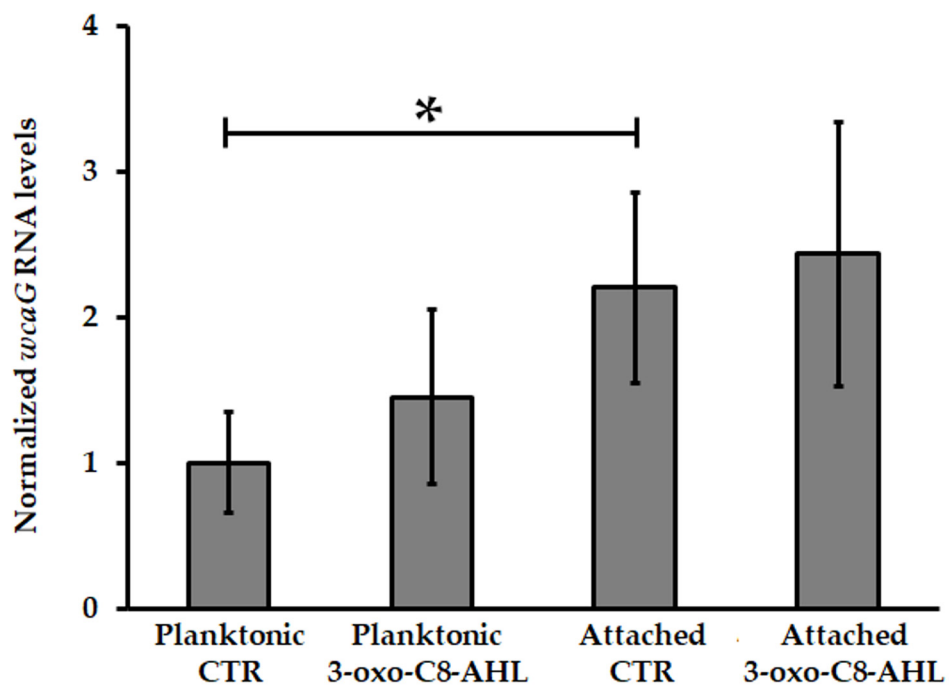

**Figure S3.** Addition of QS molecule 3-oxo-C8-AHL has no significant effect on transcription levels of *wcaG* from *A. thiooxidans*<sup>T</sup>. Total RNAs were extracted from *A. thiooxidans* WT cells obtained from 5-days growth cultures. Transcript levels of *wcaG* were measured by qPCR and then normalized using DNA 16S and *map* genes. Values represent the average of 4 independent experiments  $\pm$  standard deviation. Significant differences calculated by a one-way ANOVA test ( $p < 0.05$ ) are noted (\*). CTR, DMSO 0.01 % without AHL.

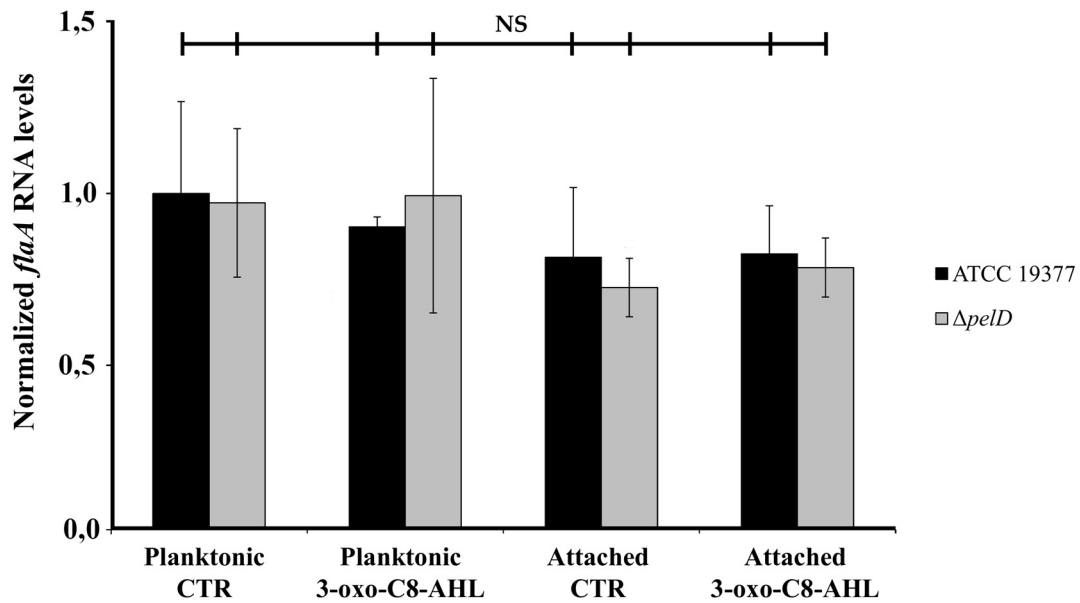

**Figure S4.** Transcriptional analysis of *flaA* gene from *A. thiooxidans*<sup>T</sup>. Total RNAs were extracted from *A. thiooxidans* cells obtained from 5-days growth cultures. Transcript levels were measured by qPCR and then normalized using DNA 16S and *map* genes. Values represent the average of 4 independent experiments  $\pm$  standard deviation. NS, None significant differences were observed by a one-way ANOVA test ( $p < 0.05$ ). CTR, DMSO 0.01 % without AHL.

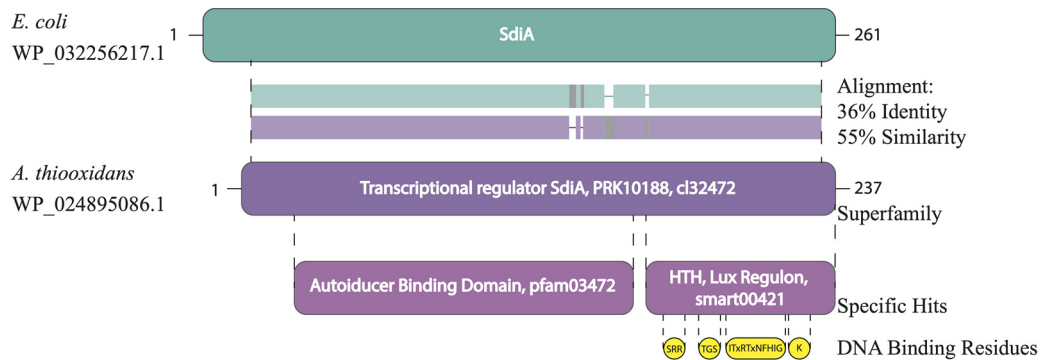

**Figure S5.** Bioinformatic characterization of WP\_024895086.1, a SdiA-like protein present in the new available genome sequences of *A. thiooxidans*. (Top) Schematic representation of SdiA (green) and WP\_024895086.1 (purple) amino acid sequence alignment. As noted, both proteins share high similarity and strong identity along over 88% of coverage. Few identified gaps are shown as lines without background color. (Bottom) Domain structure of WP\_024895086.1 protein shows the distinctive two domains of canonical QS regulators: Autoinducer Binding Domain (pfam03472) and Helix-Turn-Helix Lux Domain (smart00421), whose combination is classified as PRK10188 Superfamily. Amino acids responsible for DNA binding are depicted in yellow.
